# Supplementary material for: Multivariate and Phylogenetic Analyses Assessing the Response of Bacterial Mat Communities from an Ancient Oligotrophic Aquatic Ecosystem to Different Scenarios of Long-Term Environmental Disturbance
Source: PubMed Central journal article supplement (PMC4363631; doi:10.1371/journal.pone.0119741), 2015-03-17

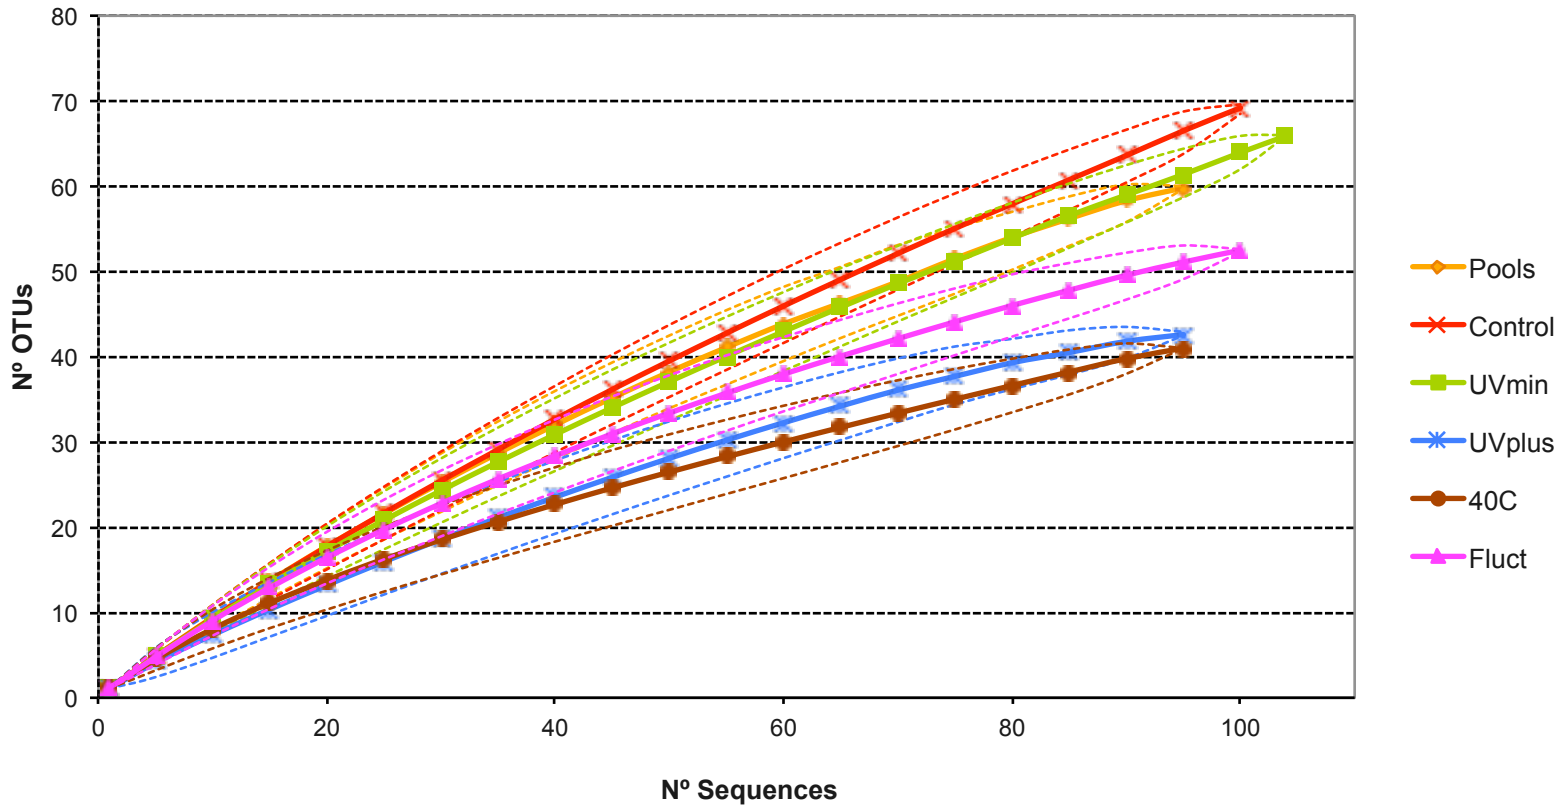

Supplement: pone.0119741.s003.pdf [file pone.0119741.s003.pdf]
