# Supplementary material for: Multivariate and Phylogenetic Analyses Assessing the Response of Bacterial Mat Communities from an Ancient Oligotrophic Aquatic Ecosystem to Different Scenarios of Long-Term Environmental Disturbance
Source: PubMed Central journal article supplement (PMC4363631; doi:10.1371/journal.pone.0119741), 2015-03-17
Supplement: pone.0119741.s005.pdf [file pone.0119741.s005.pdf]

Canberra dissimilarity

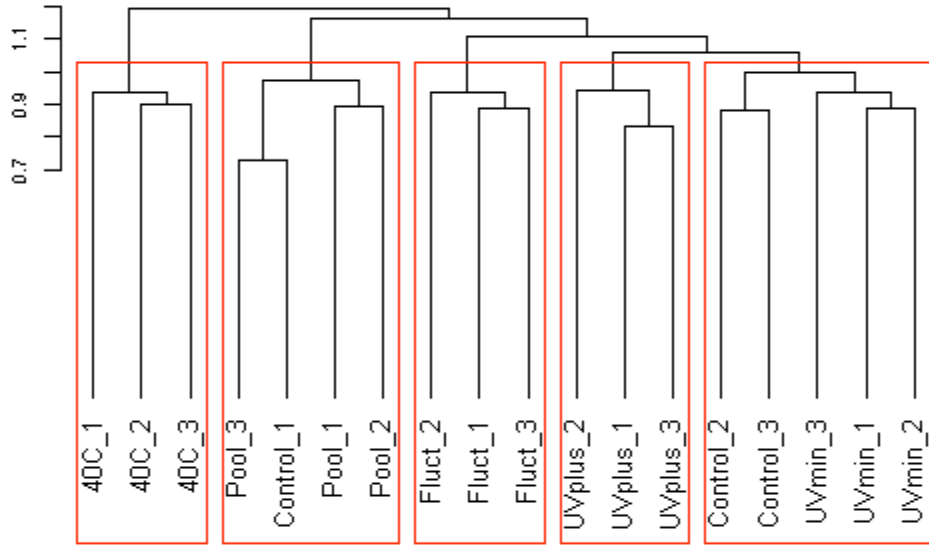

Pools and mesocosms  
hclust (\*, "ward")
