# Supplementary material for: Multivariate and Phylogenetic Analyses Assessing the Response of Bacterial Mat Communities from an Ancient Oligotrophic Aquatic Ecosystem to Different Scenarios of Long-Term Environmental Disturbance
Source: PubMed Central journal article supplement (PMC4363631; doi:10.1371/journal.pone.0119741), 2015-03-17
Supplement: pone.0119741.s006.pdf [file pone.0119741.s006.pdf]

**Table S1. Taxonomic assignment of the 250 representative OTUs (at 97% cut-off) of the microbial mats from the mesocosm experiment using the Ribosomal Database Project (RDP) tool for classification.** OTU designations are followed (in parenthesis) by the number of sequences represented by that OTU in each environment with the following order: Pools, Control, UVmin, UVplus, 40C, and Fluct. The S<sub>ab</sub> score represents the percentage of shared 7-mers between two sequences, which does not require the alignment for calculation. N° Seq is the number of sequences belonging to each OTU. Abbreviations: M is the mesocosm experiment; CCB is the Cuatro Ciénegas Basin (Mexico); GN is Guerrero Negro (Mexico); A is Alchichica Lake (Mexico); Y is Yellowstone (USA).

| OTU (97%)                                 | Putative phylum     | Best match sequence (RDP)                                       | S <sub>ab</sub> score | Habitat         | N° Seq |
|-------------------------------------------|---------------------|-----------------------------------------------------------------|-----------------------|-----------------|--------|
| Leptolyngbya sp (4,11,1,32,0,3)           | Cyanobacteria       | uncultured Leptolyngbya sp.; Cont2_11; JQ701207                 | 1                     | Freshwater (M)  | 51     |
| Leptolyngbya sp (0,2,0,0,16,0)            | Cyanobacteria       | uncultured Leptolyngbya sp.; 40C_3_32; JQ701237                 | 0.982                 | Freshwater (M)  | 18     |
| Nostocaceae bacterium (3,1,8,2,0,3)       | Cyanobacteria       | uncultured Nostocaceae cyanobacterium; UVmen2_20; JQ701223      | 0.973                 | Freshwater (M)  | 17     |
| Pseudanabaenaceae bacterium (0,3,9,2,0,0) | Cyanobacteria       | uncultured Leptolyngbya sp.; UVmen2_24; JQ701189                | 1                     | Freshwater (M)  | 14     |
| Phycisphaeraceae bacterium (1,0,0,2,11,0) | Planctomycetes      | uncultured Planctomycetales bacterium; 40C_3_23; JQ701181       | 0.92                  | Freshwater (M)  | 14     |
| Stenotrophomonas sp (7,3,1,2,0,0)         | Gammaproteobacteria | uncultured proteobacterium; YNP_BP_B75; DQ243741                | 1                     | Hot Springs (Y) | 13     |
| Rhodobacter sp (2,3,2,0,1,3)              | Alphaproteobacteria | uncultured bacterium; P1CN01; AJ504474                          | 0.941                 | Sewage sludge   | 11     |
| Bacillariophyta (2,3,0,4,0,2)             | Chloroplast         | uncultured diatom; Cont2_4; JQ701252                            | 1                     | Freshwater (M)  | 11     |
| Ohtaekwangia sp (0,2,6,1,1,0)             | Bacteroidetes       | uncultured Cytophagaceae bacterium; 40C_2_31; JQ701691          | 0.99                  | Freshwater (M)  | 10     |
| Chroococcales bacterium (0,0,0,0,0,10)    | Cyanobacteria       | uncultured cyanobacterium; SM2C12; AF445719                     | 0.945                 | Hot Springs (Y) | 10     |
| Pseudanabaenaceae bacterium (1,0,0,0,9,0) | Cyanobacteria       | uncultured Halomicronema sp.; Control_6; JQ701248               | 0.979                 | Freshwater (M)  | 10     |
| Oscillatoriales bacterium (2,0,0,3,0,5)   | Cyanobacteria       | uncultured cyanobacterium; DGGE gel band MB-06-MIC-B2; EU882217 | 0.88                  | Lake            | 10     |
| Brucellaceae bacterium (5,0,1,1,0,0)      | Alphaproteobacteria | bacterium NWTT; HQ823639                                        | 1                     | Wetland         | 7      |

|                                            |                     |                                                          |       |                    |   |
|--------------------------------------------|---------------------|----------------------------------------------------------|-------|--------------------|---|
| Hyphomicrobium sp (0,1,0,0,0,6)            | Alphaproteobacteria | uncultured Hyphomicrobium sp.; Flu3_24; JQ701463         | 1     | Freshwater (M)     | 7 |
| Porphyrobacter sp (0,3,0,3,0,1)            | Alphaproteobacteria | uncultured bacterium; 614; KC298380                      | 0.906 | Biofilm            | 7 |
| Chroococcales bacterium (0,0,4,2,0,1)      | Cyanobacteria       | uncultured bacterium; BMB09; EF126218                    | 0.944 | Microbial mat      | 7 |
| Planctomycetaceae bacterium (0,0,0,0,0,7)  | Planctomycetes      | uncultured bacterium; 3-4-51; JX012254                   | 0.854 | Groundwater        | 7 |
| Rhodobacteraceae bacterium (0,0,4,2,0,0)   | Alphaproteobacteria | uncultured Rhodobacter sp.; C1_28; JQ700882              | 1     | Freshwater (M)     | 6 |
| Leptolyngbya sp (0,0,0,0,6,0)              | Cyanobacteria       | Leptolyngbya sp. O-77; AB668059                          | 0.98  | Hot Springs        | 6 |
| Planctomycetales bacterium (0,1,3,2,0,0)   | Planctomycetes      | unidentified bacterium; Sai4P3-84; AJ518752              | 0.876 | Sediment           | 6 |
| Rhodocyclaceae bacterium (0,0,1,0,1,3)     | Betaproteobacteria  | uncultured Zoogloea sp.; UVmen2_3; JQ701605              | 0.945 | Freshwater (M)     | 5 |
| Prochloraceae bacterium (2,3,0,0,0,0)      | Cyanobacteria       | uncultured bacterium; Layer1_G06; HQ882921               | 0.858 | Microbialite (CCB) | 5 |
| Phycisphaeraceae bacterium (0,0,0,0,3,2)   | Planctomycetes      | uncultured bacterium; BACAP-OTU39; JQ791828              | 0.78  | Biofilm            | 5 |
| Erythrobacteraceae bacterium (0,0,0,4,0,0) | Alphaproteobacteria | uncultured bacterium; RT_S1_15; EU372619                 | 0.868 | Soil               | 4 |
| Rhodobacteraceae bacterium (3,1,0,0,0,0)   | Alphaproteobacteria | uncultured Labrenzia sp.; F11_12; JQ700901               | 0.831 | Freshwater (M)     | 4 |
| Sphingobacteriales bacterium (1,2,0,1,0,0) | Bacteroidetes       | uncultured Runella sp.; Cont1_38; JQ701696               | 0.993 | Freshwater (M)     | 4 |
| Chlorobiaceae bacterium (1,1,2,0,0,0)      | Chlorobi            | uncultured Chlorobium sp.; UVmen3_23; JQ701146           | 1     | Freshwater (M)     | 4 |
| Anaerolineales bacterium (0,0,1,0,3,0)     | Chloroflexi         | uncultured Chloroflexi bacterium; UV-2_18; JQ700588      | 0.995 | Freshwater (M)     | 4 |
| Chloroflexales bacterium (0,0,0,0,4,0)     | Chloroflexi         | uncultured bacterium; Cyano2E11; EU917918                | 0.634 | Microbialite       | 4 |
| Chloroflexales bacterium (0,0,0,0,4,0)     | Chloroflexi         | uncultured Gram-positive bacterium; FL02D12; AY293435    | 0.709 | Hot Springs (Y)    | 4 |
| Leptolyngbya sp (0,0,0,0,4,0)              | Cyanobacteria       | Leptolyngbya sp. ISC 83; GU937790                        | 0.773 | Freshwater         | 4 |
| Microbacteriaceae bacterium (3,0,0,0,0,0)  | Actinobacteria      | uncultured Microbacteriaceae bacterium; T0_32; JF413548  | 1     | Freshwater (M)     | 3 |
| Rhodococcus sp (1,0,2,0,0,0)               | Actinobacteria      | uncultured bacterium; N2_65J14f; AB484937                | 1     | Soil               | 3 |
| Acetobacteraceae bacterium (3,0,0,0,0,0)   | Alphaproteobacteria | uncultured Acetobacteraceae bacterium; Flu2_24; JF413277 | 0.97  | Freshwater (M)     | 3 |
| Hyphomicrobium sp (0,0,0,0,0,3)            | Alphaproteobacteria | uncultured bacterium; A58; JQ027092                      | 0.96  | Carbon filter      | 3 |
| Rhizobiales bacterium (0,0,0,0,0,3)        | Alphaproteobacteria | uncultured alpha proteobacterium; E06L-1; HE614839       | 0.782 | Biofilm            | 3 |
| Rhizobiales bacterium (0,1,0,0,0,2)        | Alphaproteobacteria | uncultured bacterium; PA20; EU743866                     | 0.729 | Sewage sludge      | 3 |

|                                            |                     |                                                                     |       |                    |   |
|--------------------------------------------|---------------------|---------------------------------------------------------------------|-------|--------------------|---|
| Rhizobiales bacterium (0,2,0,0,1,0)        | Alphaproteobacteria | uncultured Bradyrhizobiaceae bacterium; UVmen2_4; JQ701510          | 0.875 | Freshwater (M)     | 3 |
| Rhizobiales bacterium (1,2,0,0,0,0)        | Alphaproteobacteria | uncultured bacterium; Layer2_B01; HQ882945                          | 0.895 | Microbialite (CCB) | 3 |
| Rhodobacterales bacterium (0,0,0,0,0,3)    | Alphaproteobacteria | uncultured Bradyrhizobiaceae bacterium; UVmen2_4; JQ701510          | 0.941 | Freshwater (M)     | 3 |
| Roseomonas sp (2,0,0,0,0,1)                | Alphaproteobacteria | uncultured bacterium; BSTSG-19; JN104841                            | 0.876 | River sediment     | 3 |
| Sphingomonadaceae bacterium (2,0,0,0,0,1)  | Alphaproteobacteria | uncultured bacterium; OX A10; FN429481                              | 0.909 | wastewater         | 3 |
| Cytophagales bacterium (0,2,1,0,0,0)       | Bacteroidetes       | uncultured Chitinophaga sp.; Cont2_14; JQ701690                     | 0.986 | Freshwater (M)     | 3 |
| Sphingobacteriales bacterium (0,0,2,0,1,0) | Bacteroidetes       | uncultured bacterium; P060905_H09; HQ385626                         | 0.957 | Sewage sludge      | 3 |
| Chroococcales bacterium (0,0,0,0,3,0)      | Cyanobacteria       | uncultured cyanobacterium; HAVOmat31; EF032786                      | 0.751 | Microbial mat      | 3 |
| Chroococcales bacterium (0,0,0,1,0,2)      | Cyanobacteria       | uncultured cyanobacterium; DGGE gel band K7-7; DQ430970             | 0.953 | Microbial mat      | 3 |
| Chroococcales bacterium (2,1,0,0,0,0)      | Cyanobacteria       | Leptolyngbya sp. AECC1314; EU729072                                 | 0.945 | Microbial mat      | 3 |
| Leptolyngbya sp (0,3,0,0,0,0)              | Cyanobacteria       | uncultured Leptolyngbya sp.; Cont2_15; JQ701209                     | 0.946 | Freshwater (M)     | 3 |
| Leptolyngbya sp (1,1,1,0,0,0)              | Cyanobacteria       | uncultured Leptolyngbya sp.; UVmen2_43; JQ701195                    | 0.964 | Freshwater (M)     | 3 |
| Microcoleus sp (0,0,0,3,0,0)               | Cyanobacteria       | Geitlerinema sp. ZD; HQ197685                                       | 0.844 | Hot Springs        | 3 |
| Nostocaceae bacterium (0,0,0,0,3,0)        | Cyanobacteria       | uncultured Nostocaceae cyanobacterium; 40C_2_43; JQ701226           | 0.963 | Freshwater (M)     | 3 |
| Oscillatoriales bacterium (0,1,0,2,0,0)    | Cyanobacteria       | uncultured cyanobacterium; BCS92; EU728857                          | 0.81  | Microbial mat      | 3 |
| Oscillatoriales bacterium (1,0,0,0,0,2)    | Cyanobacteria       | uncultured cyanobacterium; 17f04; GQ480644                          | 0.956 | Hot Springs        | 3 |
| Oscillatoriales bacterium (3,0,0,0,0,0)    | Cyanobacteria       | uncultured cyanobacterium; DGGE band Ace-131b; EU009661             | 0.815 | Microbial mat      | 3 |
| Desulfovibrionales bacterium (0,1,0,0,0,2) | Deltaproteobacteria | uncultured bacterium; V201-33; HQ114048                             | 0.922 | Biofilm            | 3 |
| Xanthomonadaceae bacterium (1,1,1,0,0,0)   | Gammaproteobacteria | uncultured bacterium; P5; JQ958711                                  | 0.976 | Lake               | 3 |
| Acidimicrobiaceae bacterium (0,0,1,1,0,0)  | Actinobacteria      | uncultured actinobacterium; 27 WD64; EU447580                       | 0.955 | Sewage sludge      | 2 |
| Ilumatobacter sp (0,2,0,0,0,0)             | Actinobacteria      | uncultured bacterium; LaP15L64; EF667674                            | 0.929 | River sediment     | 2 |
| Hyphomonadaceae bacterium (0,2,0,0,0,0)    | Alphaproteobacteria | uncultured alpha proteobacterium; Alchichica_AQ1_2_1B_181; JN825359 | 0.929 | Lake (A)           | 2 |

|                                           |                     |                                                             |       |                    |   |
|-------------------------------------------|---------------------|-------------------------------------------------------------|-------|--------------------|---|
| Rhizobiales bacterium (0,0,0,2,0,0)       | Alphaproteobacteria | uncultured Rhizobiales bacterium; UVmas3_51; JF413750       | 0.969 | Freshwater (M)     | 2 |
| Rhizobiales bacterium (0,0,1,0,0,1)       | Alphaproteobacteria | uncultured Phyllobacteriaceae bacterium; UVmen1_4; JQ701534 | 0.803 | Freshwater (M)     | 2 |
| Rhizobiales bacterium (0,0,1,0,1,0)       | Alphaproteobacteria | uncultured Rhizobiaceae bacterium; 40_1_36; JF412861        | 0.979 | Freshwater (M)     | 2 |
| Rhizobiales bacterium (0,0,2,0,0,0)       | Alphaproteobacteria | uncultured bacterium; C-131; KC836050                       | 0.996 | Marine             | 2 |
| Rhizobiales bacterium (1,0,0,1,0,0)       | Alphaproteobacteria | uncultured bacterium; kab196; FJ936913                      | 0.957 | Mud volvano        | 2 |
| Rhizobiales bacterium (2,0,0,0,0,0)       | Alphaproteobacteria | uncultured Phyllobacteriaceae bacterium; UVmen1_4; JQ701534 | 0.954 | Freshwater (M)     | 2 |
| Rhodobacteraceae bacterium (0,0,0,2,0,0)  | Alphaproteobacteria | uncultured bacterium; TFAgeg181; HE659150                   | 0.869 | Sediment           | 2 |
| Rhodobacteraceae bacterium (0,1,1,0,0,0)  | Alphaproteobacteria | uncultured Rhodobacteraceae bacterium; UVmen3_16; JQ701671  | 0.964 | Freshwater (M)     | 2 |
| Rhodobacteraceae bacterium (2,0,0,0,0,0)  | Alphaproteobacteria | uncultured alpha proteobacterium; M-22; AM229524            | 0.945 | Microbial mat (Y)  | 2 |
| Rhodobacterales bacterium (0,1,1,0,0,0)   | Alphaproteobacteria | uncultured bacterium; 614; KC298380                         | 0.906 | Biofilm            | 2 |
| Rhodobacterales bacterium (2,0,0,0,0,0)   | Alphaproteobacteria | uncultured alpha proteobacterium; A23YA11RM; FJ569291       | 0.764 | Soil               | 2 |
| Rhodobiaceae bacterium (0,0,0,0,0,2)      | Alphaproteobacteria | uncultured bacterium; CG10; AB491708                        | 0.703 | Hot Springs        | 2 |
| Rhodospirillaceae bacterium (1,1,0,0,0,0) | Alphaproteobacteria | uncultured Phyllobacteriaceae bacterium; Cont3_31; JQ701642 | 0.99  | Freshwater (M)     | 2 |
| Sphingomonadaceae bacterium (0,0,0,2,0,0) | Alphaproteobacteria | uncultured Sphingopyxis sp.; UVmas2_43; JQ701429            | 0.929 | Freshwater (M)     | 2 |
| Cytophagaceae bacterium (1,1,0,0,0,0)     | Bacteroidetes       | uncultured bacterium; Layer1_H06; HQ882932                  | 0.769 | Microbialite (CCB) | 2 |
| Haliscomenobacter sp (0,0,0,0,1,1)        | Bacteroidetes       | uncultured bacterium; Layer1_C05; HQ882876                  | 0.881 | Microbialite (CCB) | 2 |
| Haliscomenobacter sp (1,1,0,0,0,0)        | Bacteroidetes       | uncultured bacterium; PA69; EU743894                        | 0.89  | Sewage sludge      | 2 |
| Saprospiraceae bacterium (0,1,0,0,1,0)    | Bacteroidetes       | uncultured Saprospiraceae bacterium; Cont1_61; JF413097     | 0.991 | Freshwater (M)     | 2 |
| Saprospiraceae bacterium (2,0,0,0,0,0)    | Bacteroidetes       | uncultured bacterium; V201-175; HQ114190                    | 0.794 | Biofilm            | 2 |
| Caldilinea sp (0,0,0,0,0,2)               | Chloroflexi         | uncultured bacterium; BJGMM-1s-310; JQ800792                | 0.745 | Soil               | 2 |
| Caldilinea sp (0,0,1,1,0,0)               | Chloroflexi         | uncultured bacterium; 31; FJ623297                          | 0.852 | Sewage sludge      | 2 |
| Caldilinea sp (0,0,2,0,0,0)               | Chloroflexi         | uncultured Chloroflexi bacterium; UVmen3_35;                | 1     | Freshwater (M)     | 2 |

JQ701156

|                                           |                     |                                                                    |       |                   |   |
|-------------------------------------------|---------------------|--------------------------------------------------------------------|-------|-------------------|---|
| Bacillariophyta (0,1,1,0,0,0)             | Chloroplast         | uncultured cyanobacterium; CYAVE50; FJ774032                       | 0.852 | Lake              | 2 |
| Chroococcales bacterium t (0,0,0,0,0,2)   | Cyanobacteria       | uncultured Prochlorothrix sp.; Cont2_29; JQ701194                  | 0.903 | Freshwater (M)    | 2 |
| Chroococcales bacterium (0,0,2,0,0,0)     | Cyanobacteria       | uncultured bacterium; B0610R001_H23; AB657800                      | 0.759 | Soil              | 2 |
| Chroococcales bacterium (0,0,2,0,0,0)     | Cyanobacteria       | uncultured Leptolyngbya sp.; UVmen2_25; JQ701197                   | 0.764 | Freshwater (M)    | 2 |
| Chroococcales bacterium (1,1,0,0,0,0)     | Cyanobacteria       | uncultured Chroococcales cyanobacterium; Cont3_4; JF413184         | 0.991 | Freshwater (M)    | 2 |
| Synechococcaceae bacterium (2,0,0,0,0,0)  | Cyanobacteria       | uncultured bacterium; B-35; HQ661201                               | 1     | Freshwater        | 2 |
| Leptolyngbya sp (0,0,1,0,0,1)             | Cyanobacteria       | uncultured bacterium; C1_12; JQ700608                              | 0.99  | Freshwater (M)    | 2 |
| Nostoc sp (0,0,1,1,0,0)                   | Cyanobacteria       | uncultured cyanobacterium; UVmen1_37; JQ701169                     | 1     | Freshwater (M)    | 2 |
| Nostocaceae bacterium (0,0,2,0,0,0)       | Cyanobacteria       | uncultured cyanobacterium; DGGE gel band MB-06-MIC-B13; EU882221   | 0.891 | Lake              | 2 |
| Nostocaceae bacterium (1,0,0,0,0,1)       | Cyanobacteria       | uncultured Nostocaceae cyanobacterium; Flu1_18; JQ701162           | 1     | Freshwater (M)    | 2 |
| Pseudanabaena sp (2,0,0,0,0,0)            | Cyanobacteria       | uncultured Oscillatoriales cyanobacterium; Flu2_7; JF413310        | 0.936 | Freshwater (M)    | 2 |
| Myxococcales bacterium (0,0,0,0,2,0)      | Deltaproteobacteria | uncultured delta proteobacterium; Alchichica_AQ2_1_1B_12; JN825520 | 0.76  | Lake (A)          | 2 |
| Phycisphaeraceae bacterium (0,0,2,0,0,0)  | Planctomycetes      | uncultured Planctomycetales bacterium; UVmen3_38; JQ701685         | 0.97  | Freshwater (M)    | 2 |
| Phycisphaeraceae bacterium (0,1,1,0,0,0)  | Planctomycetes      | uncultured bacterium; Be_021; FR667403                             | 0.647 | Biofilm           | 2 |
| Phycisphaeraceae bacterium (1,0,0,0,0,1)  | Planctomycetes      | uncultured deep-sea bacterium; Ucs1505; AM997706                   | 0.697 | Sea sediment      | 2 |
| Phycisphaerales bacterium (0,1,0,1,0,0)   | Planctomycetes      | uncultured bacterium; BMT05; EF126245                              | 0.913 | Microbial mat     | 2 |
| Planctomycetaceae bacterium (1,1,0,0,0,0) | Planctomycetes      | uncultured Pirellula sp.; CL2.C40; FM175380                        | 0.979 | Freshwater        | 2 |
| Acidobacteria_Gp3 bacterium (0,1,0,0,0,0) | Acidobacteria       | uncultured bacterium; F5-B48; FJ206864                             | 0.823 | Microbial mat (Y) | 1 |
| Bryobacter sp (0,0,1,0,0,0)               | Acidobacteria       | uncultured bacterium; Reactor5_71; JQ629895                        | 0.865 | Bioreactor        | 1 |
| Microbacteriaceae bacterium (0,1,0,0,0,0) | Actinobacteria      | uncultured actinobacterium; c-10; GQ144943                         | 0.955 | Marine            | 1 |
| Microbacteriaceae bacterium (1,0,0,0,0,0) | Actinobacteria      | uncultured actinobacterium; Ume_OR_81; FJ646424                    | 0.903 | Freshwater        | 1 |

|                                              |                     |                                                                       |       |                       |   |
|----------------------------------------------|---------------------|-----------------------------------------------------------------------|-------|-----------------------|---|
| Microbacteriaceae bacterium<br>(1,0,0,0,0,0) | Actinobacteria      | uncultured Actinobacteridae bacterium; UVmas3_86;<br>JF413782         | 1     | Freshwater (M)        | 1 |
| Acetobacteraceae bacterium (0,0,1,0,0,0)     | Alphaproteobacteria | Uncultured bacterium A11; CW3P1_7F; KC110528                          | 0.833 | Wastewater            | 1 |
| Acetobacteraceae bacterium (1,0,0,0,0,0)     | Alphaproteobacteria | uncultured bacterium; F5K2Q4C04IXZNE; GU915450                        | 0.84  | Sewage sludge         | 1 |
| Brevundimonas sp (0,0,0,0,0,1)               | Alphaproteobacteria | uncultured bacterium; XYHPA.0912.106; HQ904741                        | 0.982 | Lake                  | 1 |
| Defluviicoccus sp (0,0,0,0,0,1)              | Alphaproteobacteria | uncultured bacterium; Layer2_D06; HQ882971                            | 0.93  | Microbialite<br>(CCB) | 1 |
| Defluviicoccus sp (0,0,0,1,0,0)              | Alphaproteobacteria | uncultured organism; W-OTU3; JN638452                                 | 0.893 | Sewage sludge         | 1 |
| Defluviicoccus sp (0,0,1,0,0,0)              | Alphaproteobacteria | uncultured cyanobacterium; DGGE gel band MB-06-<br>MIC-B11; EU882218  | 0.777 | Lake                  | 1 |
| Elioraea sp (0,0,1,0,0,0)                    | Alphaproteobacteria | uncultured bacterium; F5-B11; FJ206847                                | 0.969 | Microbial mat<br>(Y)  | 1 |
| Geminicoccus sp (0,0,0,0,0,1)                | Alphaproteobacteria | uncultured alpha proteobacterium;<br>Alchichica_AQ1_1_1B_74; JN825372 | 0.84  | Lake (A)              | 1 |
| Geminicoccus sp (0,1,0,0,0,0)                | Alphaproteobacteria | uncultured bacterium; 293c2; EF460011                                 | 0.727 | Sea sediment          | 1 |
| Hyphomicrobiaceae bacterium<br>(0,0,0,1,0,0) | Alphaproteobacteria | uncultured bacterium; F7-B72; FJ206967                                | 0.893 | Microbial mat<br>(Y)  | 1 |
| Hyphomonadaceae bacterium<br>(0,0,0,1,0,0)   | Alphaproteobacteria | uncultured organism; SBZP_3756; JN537099                              | 0.797 | Microbial mat<br>(GN) | 1 |
| Hyphomonadaceae bacterium<br>(0,0,1,0,0,0)   | Alphaproteobacteria | uncultured Ochrobactrum sp.; C2_33; JQ700800                          | 1     | Freshwater (M)        | 1 |
| Hyphomonas sp (0,0,1,0,0,0)                  | Alphaproteobacteria | uncultured Hyphomonas sp.; C1_31; JQ700784                            | 0.99  | Freshwater (M)        | 1 |
| Methylobacterium sp (0,0,1,0,0,0)            | Alphaproteobacteria | Methylobacterium sp. DDW-1; FJ225120                                  | 0.979 | Soil                  | 1 |
| Methylocystis sp (0,0,1,0,0,0)               | Alphaproteobacteria | uncultured proteobacterium; DGGE band 9alpha 6;<br>AJ429168           | 0.913 | Soil                  | 1 |
| Parvularculaceae bacterium (0,0,0,0,0,1)     | Alphaproteobacteria | uncultured alpha proteobacterium; F10CONTROL D35;<br>GQ242877         | 0.784 | Sea sediment          | 1 |
| Phenylobacterium sp (0,0,0,0,1,0)            | Alphaproteobacteria | uncultured Phenylobacterium sp.; 40C_1_35; JQ701304                   | 1     | Freshwater (M)        | 1 |
| Rhizobiaceae bacterium (0,0,0,1,0,0)         | Alphaproteobacteria | uncultured Rhizobiaceae bacterium; T0_17; JF413471                    | 0.97  | Freshwater (M)        | 1 |
| Rhizobiales bacterium (0,0,0,0,0,1)          | Alphaproteobacteria | uncultured bacterium; sw019; GQ258096                                 | 0.76  | Marine                | 1 |
| Rhizobiales bacterium (0,0,0,0,0,1)          | Alphaproteobacteria | uncultured organism; SBZA_e704; JN499892                              | 0.765 | Microbial mat<br>(GN) | 1 |

|                                           |                     |                                                                  |       |                    |   |
|-------------------------------------------|---------------------|------------------------------------------------------------------|-------|--------------------|---|
| Rhizobiales bacterium (0,0,0,0,1)         | Alphaproteobacteria | uncultured Phyllobacteriaceae bacterium; UVmen1_15; JQ701540     | 0.989 | Freshwater (M)     | 1 |
| Rhizobiales bacterium (0,0,0,1,0)         | Alphaproteobacteria | uncultured bacterium; DP7.3.50; FJ612219                         | 0.816 | Lake               | 1 |
| Rhizobiales bacterium (0,0,0,0,1,0)       | Alphaproteobacteria | uncultured Labrenzia sp.; 40-3_23; JQ700900                      | 0.822 | Freshwater (M)     | 1 |
| Rhizobiales bacterium (0,0,0,0,1,0)       | Alphaproteobacteria | uncultured bacterium; BRA041; EU284313                           | 0.875 | Sediment           | 1 |
| Rhizobiales bacterium (0,0,0,0,1,0)       | Alphaproteobacteria | uncultured Parvibaculum sp.; 40C_3_13; JQ701587                  | 0.952 | Freshwater (M)     | 1 |
| Rhizobiales bacterium (0,0,0,1,0,0)       | Alphaproteobacteria | uncultured Mesorhizobium sp.; UVmas1_55; JQ701343                | 0.989 | Freshwater (M)     | 1 |
| Rhizobiales bacterium (0,0,1,0,0,0)       | Alphaproteobacteria | uncultured bacterium; SW-6A_G08; JX286074                        | 0.722 | Drinking water     | 1 |
| Rhizobiales bacterium (0,0,1,0,0,0)       | Alphaproteobacteria | uncultured bacterium; HB9; AY996569                              | 0.845 | Groundwater        | 1 |
| Rhizobiales bacterium (0,0,1,0,0,0)       | Alphaproteobacteria | uncultured bacterium; 300C8; JF827556                            | 0.876 | Marine             | 1 |
| Rhizobiales bacterium (0,1,0,0,0,0)       | Alphaproteobacteria | uncultured organism; SBZC_1386; JN505561                         | 0.855 | Microbial mat (GN) | 1 |
| Rhodobacter sp (1,0,0,0,0,0)              | Alphaproteobacteria | uncultured bacterium; PICN01; AJ504474                           | 0.831 | Sewage sludge      | 1 |
| Rhodobacteraceae bacterium (0,0,0,1,0,0)  | Alphaproteobacteria | uncultured bacterium; PA20; EU743866                             | 0.826 | Sewage sludge      | 1 |
| Rhodobacteraceae bacterium (0,0,0,1,0,0)  | Alphaproteobacteria | uncultured bacterium; Baqar.Sed.Eubac.20; AB355069               | 0.959 | Sediment           | 1 |
| Rhodobacteraceae bacterium (0,0,1,0,0,0)  | Alphaproteobacteria | uncultured alpha proteobacterium; PA-C40; DQ295412               | 0.704 | Soil               | 1 |
| Rhodobacteraceae bacterium (0,1,0,0,0,0)  | Alphaproteobacteria | uncultured bacterium; PA20; EU743866                             | 0.766 | Sewage sludge      | 1 |
| Rhodobacterales bacterium (0,0,0,0,0,1)   | Alphaproteobacteria | uncultured alpha proteobacterium; WT172G01R; EU079363            | 0.807 | Rhizoplane         | 1 |
| Rhodobacterales bacterium (0,1,0,0,0,0)   | Alphaproteobacteria | uncultured Rhodobacterales bacterium; C3_20; JQ700856            | 0.949 | Freshwater (M)     | 1 |
| Rhodospirillaceae bacterium (0,0,0,0,0,1) | Alphaproteobacteria | uncultured bacterium; S12_025; KC872142                          | 0.816 | Marine             | 1 |
| Rhodospirillaceae bacterium (0,0,0,0,0,1) | Alphaproteobacteria | uncultured bacterium; DH100507_12B; KC358506                     | 0.852 | Groundwater        | 1 |
| Rhodospirillaceae bacterium (0,0,0,0,1,0) | Alphaproteobacteria | uncultured Rhodocista sp.; 40_2_26; JF412910                     | 0.968 | Freshwater (M)     | 1 |
| Rhodospirillaceae bacterium (0,0,0,1,0,0) | Alphaproteobacteria | uncultured bacterium; Layer2_G05; HQ883003                       | 0.886 | Microbialite (CCB) | 1 |
| Rhodospirillales bacterium (0,1,0,0,0,0)  | Alphaproteobacteria | uncultured bacterium; sw019; GQ258096                            | 0.664 | Marine             | 1 |
| Rickettsiaceae bacterium (0,1,0,0,0,0)    | Alphaproteobacteria | uncultured cyanobacterium; DGGE gel band MB-06-MIC-B11; EU882218 | 0.705 | Lake               | 1 |

|                                          |                     |                                                                  |       |                    |   |
|------------------------------------------|---------------------|------------------------------------------------------------------|-------|--------------------|---|
| Roseomonas sp (0,0,0,0,1)                | Alphaproteobacteria | uncultured alpha proteobacterium; AKYG679; AY922054              | 0.823 | Soil               | 1 |
| Roseomonas sp (0,0,1,0,0)                | Alphaproteobacteria | uncultured Roseomonas sp.; 40C_2_19; JQ701648                    | 0.887 | Freshwater (M)     | 1 |
| Roseomonas sp (1,0,0,0,0)                | Alphaproteobacteria | uncultured alpha proteobacterium; M1_F10; EU051946               | 0.818 | Soil               | 1 |
| Chitinophagaceae bacterium (1,0,0,0,0)   | Bacteroidetes       | uncultured Sphingobacteriales bacterium; T0_110; JF413409        | 0.981 | Freshwater (M)     | 1 |
| Cytophagaceae bacterium (0,0,0,0,1)      | Bacteroidetes       | Uncultured bacterium; Layer1_E08; HQ882899                       | 0.631 | Microbialite (CCB) | 1 |
| Cytophagaceae bacterium (0,1,0,0,0)      | Bacteroidetes       | Algoriphagus aquatilis; NBRC 104237; AB682160                    | 0.848 | Lake               | 1 |
| Porphyromonadaceae bacterium (1,0,0,0,0) | Bacteroidetes       | uncultured Rikenellaceae bacterium; T0_46; JF413562              | 1     | Freshwater (M)     | 1 |
| Saprospiraceae bacterium (0,0,0,0,1)     | Bacteroidetes       | uncultured bacterium; SINI968; HM127278                          | 0.783 | Lake               | 1 |
| Saprospiraceae bacterium (0,0,0,0,1,0)   | Bacteroidetes       | uncultured Bacteroidetes bacterium; DGGE band GWS-AG-9; AY274243 | 0.625 | Marine             | 1 |
| Saprospiraceae bacterium (0,0,0,0,1,0)   | Bacteroidetes       | uncultured organism; MAT-CR-H3-E04; EU245170                     | 0.729 | Microbial mat (Y)  | 1 |
| Saprospiraceae bacterium (0,0,0,1,0,0)   | Bacteroidetes       | uncultured organism; SBYX_5997; JN490935                         | 0.695 | Microbial mat (GN) | 1 |
| Saprospiraceae bacterium (0,1,0,0,0,0)   | Bacteroidetes       | uncultured Lewinella sp.; Cont2_28; JQ701693                     | 1     | Freshwater (M)     | 1 |
| Sphingobacteriales bacterium (0,0,0,0,1) | Bacteroidetes       | uncultured bacterium; DGGE Band 11; AY487128                     | 0.684 | Biofilm            | 1 |
| Sphingobacteriales bacterium (0,0,0,0,1) | Bacteroidetes       | uncultured bacterium; Layer2_G06; HQ883004                       | 0.908 | Microbialite (CCB) | 1 |
| Sphingobacteriales bacterium (0,0,0,0,1) | Bacteroidetes       | uncultured bacterium; Layer2_E03; HQ882980                       | 0.937 | Microbialite (CCB) | 1 |
| Sphingobacteriales bacterium (1,0,0,0,0) | Bacteroidetes       | uncultured bacterium; Layer1_D12; HQ882891                       | 0.669 | Microbialite (CCB) | 1 |
| Sphingobacteriales bacterium (1,0,0,0,0) | Bacteroidetes       | uncultured bacterium; Layer1_B09; HQ882869                       | 0.8   | Microbialite (CCB) | 1 |
| Burkholderiales bacterium (0,0,1,0,0,0)  | Betaproteobacteria  | uncultured bacterium; F5K2Q4C04IOOCS; GU916301                   | 0.847 | Sewage sludge      | 1 |
| Comamonadaceae bacterium (0,0,1,0,0,0)   | Betaproteobacteria  | uncultured Rhodoferax sp.; SSCP Band 10; AM267489                | 0.785 | Biofilm            | 1 |
| Comamonadaceae bacterium (1,0,0,0,0,0)   | Betaproteobacteria  | uncultured bacterium; PA31; EU743899                             | 0.959 | Sewage sludge      | 1 |
| Methyloversatilis sp (0,1,0,0,0,0)       | Betaproteobacteria  | uncultured bacterium; ZBAF3-24; HQ682050                         | 0.952 | Biofilm            | 1 |



|                                            |                    |                                                                 |       |                    |   |
|--------------------------------------------|--------------------|-----------------------------------------------------------------|-------|--------------------|---|
| Oxalobacteraceae bacterium (0,0,1,0,0,0)   | Betaproteobacteria | uncultured Ralstonia sp.; UVmen3_40; JQ701607                   | 0.98  | Freshwater (M)     | 1 |
| Ignavibacteriaceae bacterium (1,0,0,0,0,0) | Chlorobi           | uncultured bacterium; SG102-3_25; HM146701                      | 0.761 | Sediment           | 1 |
| Anaerolineaceae bacterium (0,0,0,0,0,1)    | Chloroflexi        | uncultured organism; SBYN_2222; JN461990                        | 0.731 | Microbial mat (GN) | 1 |
| Anaerolineaceae bacterium (0,1,0,0,0,0)    | Chloroflexi        | uncultured organism; SBXY_5453; JN430136                        | 0.71  | Microbial mat (GN) | 1 |
| Anaerolineaceae bacterium (0,1,0,0,0,0)    | Chloroflexi        | uncultured organism; SBYT_5140; JN482597                        | 0.719 | Microbial mat (GN) | 1 |
| Anaerolineaceae bacterium (1,0,0,0,0,0)    | Chloroflexi        | uncultured organism; SBXZ_3827; JN433121                        | 0.579 | Microbial mat (GN) | 1 |
| Anaerolineaceae bacterium (1,0,0,0,0,0)    | Chloroflexi        | uncultured Chloroflexi bacterium; TDNP_Bbc97_242_1_63; FJ516783 | 0.677 | Freshwater         | 1 |
| Anaerolineaceae bacterium (1,0,0,0,0,0)    | Chloroflexi        | uncultured Chloroflexi bacterium; IAFpp7112; GU214126           | 0.708 | wastewater         | 1 |
| Caldilinea sp (0,0,0,0,0,1)                | Chloroflexi        | uncultured bacterium; F5K2Q4C04IB9N9; GU913326                  | 0.803 | Sewage sludge      | 1 |
| Caldilinea sp (0,0,0,1,0,0)                | Chloroflexi        | uncultured bacterium; NBBAB0409_66; JQ072889                    | 0.936 | Sewage sludge      | 1 |
| Bacillariophyta (0,0,0,1,0,0)              | Chloroplast        | uncultured bacterium; Layer2_D06; HQ882971                      | 0.93  | Microbialite (CCB) | 1 |
| Streptophyta (1,0,0,0,0,0)                 | Chloroplast        | Glechoma hederacea; DQ417652                                    | 0.987 | Soil               | 1 |
| Chroococcales bacterium (0,0,1,0,0,0)      | Cyanobacteria      | uncultured cyanobacterium; DGGE gel band MB-06-MIC-B2; EU882217 | 0.908 | Lake               | 1 |
| Chroococcales bacterium (0,1,0,0,0,0)      | Cyanobacteria      | uncultured cyanobacterium; DGGE gel band K7-7; DQ430970         | 0.766 | Microbial mat      | 1 |
| Chroococcales bacterium (0,1,0,0,0,0)      | Cyanobacteria      | uncultured cyanobacterium; DGGE gel band MB-06-MIC-B2; EU882217 | 0.826 | Lake               | 1 |
| Chroococcales bacterium (0,1,0,0,0,0)      | Cyanobacteria      | uncultured cyanobacterium; BAC_2_H01; FJ967935                  | 0.858 | Hot Springs        | 1 |
| Leptolyngbya sp (0,0,0,1,0,0)              | Cyanobacteria      | uncultured Leptolyngbya sp.; UVmas1_54; JQ701193                | 1     | Freshwater (M)     | 1 |
| Leptolyngbya sp (0,0,1,0,0,0)              | Cyanobacteria      | uncultured Leptolyngbya sp.; UVmen2_25; JQ701197                | 0.961 | Freshwater (M)     | 1 |
| Nostocaceae bacterium (0,1,0,0,0,0)        | Cyanobacteria      | cyanobacterium LEGE 06123; FJ589716                             | 0.928 | Marine             | 1 |
| Nostocales bacterium (0,0,1,0,0,0)         | Cyanobacteria      | uncultured cyanobacterium; DGGE gel band MB-06-MIC-B2; EU882217 | 0.87  | Lake               | 1 |
| Oscillatoriales bacterium (0,0,0,0,1,0)    | Cyanobacteria      | uncultured cyanobacterium; TDNP_Wbc97_251_1_123; FJ517069       | 0.805 | Freshwater         | 1 |

|                                            |                     |                                                                    |       |                    |   |
|--------------------------------------------|---------------------|--------------------------------------------------------------------|-------|--------------------|---|
| Oscillatoriales bacterium (0,0,0,0,1,0)    | Cyanobacteria       | uncultured cyanobacterium; F1BE01; FJ885984                        | 0.827 | Microbial mat (Y)  | 1 |
| Oscillatoriales bacterium (0,0,0,0,1,0)    | Cyanobacteria       | uncultured cyanobacterium; DGGE gel band MB-06-MIC-B2; EU882217    | 0.908 | Lake               | 1 |
| Oscillatoriales bacterium (0,0,0,0,1,0)    | Cyanobacteria       | uncultured bacterium; A58; JQ027092                                | 0.96  | Carbon filter      | 1 |
| Oscillatoriales bacterium (0,0,0,1,0,0)    | Cyanobacteria       | uncultured cyanobacterium; DGGE gel band MB-06-MIC-B2; EU882217    | 0.761 | Lake               | 1 |
| Oscillatoriales bacterium (0,0,1,0,0,0)    | Cyanobacteria       | uncultured cyanobacterium; LH-69; AB265892                         | 0.813 | Soil               | 1 |
| Oscillatoriales bacterium (0,0,1,0,0,0)    | Cyanobacteria       | uncultured cyanobacterium; DGGE gel band MB-06-MIC-B13; EU882221   | 0.851 | Lake               | 1 |
| Oscillatoriales bacterium (0,0,1,0,0,0)    | Cyanobacteria       | uncultured Oscillatoriales cyanobacterium; UVmen2_33; JQ701187     | 1     | Freshwater (M)     | 1 |
| Oscillatoriales bacterium (0,1,0,0,0,0)    | Cyanobacteria       | uncultured cyanobacterium; DGGE gel band MB-06-MIC-B2; EU882217    | 0.853 | Lake               | 1 |
| Oscillatoriales bacterium (0,1,0,0,0,0)    | Cyanobacteria       | uncultured bacterium; BMB09; EF126218                              | 0.944 | Microbial mat      | 1 |
| Oscillatoriales bacterium (1,0,0,0,0,0)    | Cyanobacteria       | uncultured cyanobacterium; DGGE gel band MB-06-MIC-B10; EU882215   | 0.745 | Lake               | 1 |
| Oscillatoriales bacterium (1,0,0,0,0,0)    | Cyanobacteria       | uncultured bacterium; Layer1_B08; HQ882868                         | 0.937 | Microbialite (CCB) | 1 |
| Prochlorothrix sp (0,0,0,1,0,0)            | Cyanobacteria       | uncultured Prochlorothrix sp.; Cont2_29; JQ701194                  | 0.903 | Freshwater (M)     | 1 |
| Pseudanabaena sp (0,0,0,0,1,0)             | Cyanobacteria       | uncultured Pseudanabaena sp.; 40C_1_20; JQ701229                   | 0.99  | Freshwater (M)     | 1 |
| Pseudanabaena sp (0,0,1,0,0,0)             | Cyanobacteria       | uncultured Pseudanabaena sp.; UVmas1_3; JQ701183                   | 0.951 | Freshwater (M)     | 1 |
| Pseudanabaenaceae bacterium (0,0,0,0,1,0)  | Cyanobacteria       | uncultured Halomicronema sp.; Control_7; JQ701249                  | 0.842 | Freshwater (M)     | 1 |
| Scytonemataceae bacterium (0,0,1,0,0,0)    | Cyanobacteria       | Scytonema sp. LCRSM-NDc; JN705691                                  | 0.949 | Freshwater         | 1 |
| Desulfovibrionales bacterium (0,0,0,0,0,1) | Deltaproteobacteria | uncultured delta proteobacterium; Alchichica_AQ1_1_1B_26; JN825525 | 0.926 | Lake (A)           | 1 |
| Desulfuromonadales bacterium (0,0,0,1,0,0) | Deltaproteobacteria | uncultured bacterium; CT1C2BE12; JQ427821                          | 0.782 | Soil               | 1 |
| Desulfuromonadales bacterium (1,0,0,0,0,0) | Deltaproteobacteria | uncultured delta proteobacterium; A19YI04RM; FJ568484              | 0.826 | Soil               | 1 |
| Myxococcales bacterium (0,0,0,0,1,0)       | Deltaproteobacteria | uncultured bacterium; V201-33; HQ114048                            | 0.922 | Biofilm            | 1 |
| Myxococcales bacterium (0,1,0,0,0,0)       | Deltaproteobacteria | uncultured Chondromyces sp.; 40-3_34; JQ700683                     | 0.745 | Freshwater (M)     | 1 |

|                                             |                     |                                                                           |       |                |   |
|---------------------------------------------|---------------------|---------------------------------------------------------------------------|-------|----------------|---|
| Nannocystaceae bacterium (0,0,0,0,0,1)      | Deltaproteobacteria | uncultured bacterium; F5K2Q4C04IOH5Y; GU912971                            | 0.84  | Sewage sludge  | 1 |
| Nannocystaceae bacterium (0,0,0,0,0,1)      | Deltaproteobacteria | uncultured bacterium; B0618R003_H08; AB659094                             | 0.857 | Soil           | 1 |
| Syntrophobacterales bacterium (0,0,0,0,1,0) | Deltaproteobacteria | uncultured Desulfovibrio sp.; 40C_3_14; JQ701290                          | 0.992 | Freshwater (M) | 1 |
| Chromatiales bacterium (0,0,1,0,0,0)        | Gammaproteobacteria | uncultured gamma proteobacterium; VERDEA80; FJ902650                      | 0.783 | Biofilm        | 1 |
| Coxiellaceae bacterium (0,1,0,0,0,0)        | Gammaproteobacteria | uncultured Coxiellaceae bacterium; UVmen1_5; JQ701274                     | 0.994 | Freshwater (M) | 1 |
| Legionellales bacterium (1,0,0,0,0,0)       | Gammaproteobacteria | uncultured Coxiellaceae bacterium; UVmen1_46; JF413819                    | 1     | Freshwater (M) | 1 |
| Pseudomonas sp (0,0,0,1,0,0)                | Gammaproteobacteria | uncultured eubacterium; GL178.11; AY038628                                | 1     | Sediment       | 1 |
| Silanimonas sp (0,1,0,0,0,0)                | Gammaproteobacteria | uncultured bacterium; NN07; JN869078                                      | 0.962 | Lake           | 1 |
| Sinobacteraceae bacterium (1,0,0,0,0,0)     | Gammaproteobacteria | uncultured bacterium; CV109; DQ499329                                     | 0.754 | Biofilm        | 1 |
| Gemmatimonas sp (0,0,1,0,0,0)               | Gemmatimonadetes    | uncultured bacterium; SEAA1DB091; KC432048                                | 0.893 | Wetland        | 1 |
| Gemmata sp (0,1,0,0,0,0)                    | Planctomycetes      | uncultured bacterium; S2_125; JX406270                                    | 0.864 | Lake           | 1 |
| Phycisphaera sp (0,0,0,0,1,0)               | Planctomycetes      | uncultured bacterium; ELSC-TVG13-B68; GU220761                            | 0.712 | Hot Springs    | 1 |
| Phycisphaera sp (0,1,0,0,0,0)               | Planctomycetes      | uncultured bacterium; Strom2G07; EU918120                                 | 0.775 | Microbialite   | 1 |
| Phycisphaera sp (0,1,0,0,0,0)               | Planctomycetes      | uncultured bacterium; SEAB1CH011; KC432190                                | 0.897 | Wetland        | 1 |
| Phycisphaeraceae bacterium (0,0,0,0,1,0)    | Planctomycetes      | uncultured bacterium; S-73; KIST-JJY006; EF522844                         | 0.701 | Sewage sludge  | 1 |
| Phycisphaeraceae bacterium (0,0,0,0,1,0)    | Planctomycetes      | uncultured Planctomycetales bacterium; Alchichica_AL31_2_1B_172; JN825612 | 0.736 | Lake (A)       | 1 |
| Phycisphaeraceae bacterium (0,0,1,0,0,0)    | Planctomycetes      | uncultured bacterium; N2_024; JX406211                                    | 0.941 | Lake           | 1 |
| Phycisphaeraceae bacterium (0,1,0,0,0,0)    | Planctomycetes      | uncultured bacterium; CyanoF10; EU917837                                  | 0.751 | Microbialite   | 1 |
| Phycisphaeraceae bacterium (0,1,0,0,0,0)    | Planctomycetes      | uncultured bacterium; CyanoF10; EU917837                                  | 0.803 | Microbialite   | 1 |
| Phycisphaeraceae bacterium (1,0,0,0,0,0)    | Planctomycetes      | uncultured bacterium; cpw1d616; HM921100                                  | 0.918 | Groundwater    | 1 |
| Phycisphaerales bacterium (0,0,1,0,0,0)     | Planctomycetes      | uncultured bacterium; 4-3; KC521963                                       | 0.786 | Soil           | 1 |
| Phycisphaerales bacterium (0,0,1,0,0,0)     | Planctomycetes      | uncultured planctomycete; HG-B01113; JN409100                             | 0.834 | Soil           | 1 |
| Phycisphaerales bacterium (1,0,0,0,0,0)     | Planctomycetes      | uncultured planctomycete; OTU37/APA; 2F11; AM902605                       | 0.624 | Hot Springs    | 1 |
| Phycisphaerales bacterium (1,0,0,0,0,0)     | Planctomycetes      | uncultured bacterium; ASNR-13; JQ809241                                   | 0.67  | Sewage sludge  | 1 |
| Planctomyces sp (0,0,0,0,0,1)               | Planctomycetes      | Planctomyces brasiliensis; LU4-23; JX307094                               | 0.84  | Groundwater    | 1 |

|                                                     |                 |                                                                           |       |                    |   |
|-----------------------------------------------------|-----------------|---------------------------------------------------------------------------|-------|--------------------|---|
| Planctomyces sp (0,0,0,0,1,0)                       | Planctomycetes  | Planctomyces brasiliensis; LU4-23; JX307094                               | 0.843 | Oil well water     | 1 |
| Planctomycetaceae bacterium (0,0,0,0,0,1)           | Planctomycetes  | uncultured Planctomyces sp.; Cont1_11; JQ701674                           | 0.974 | Freshwater (M)     | 1 |
| Planctomycetaceae bacterium (0,0,0,0,1,0)           | Planctomycetes  | uncultured Planctomycetaceae bacterium; Flu2_6; JF413304                  | 0.792 | Freshwater (M)     | 1 |
| Planctomycetaceae bacterium (0,0,0,1,0,0)           | Planctomycetes  | uncultured bacterium; 10NIIH27; JN644181                                  | 0.906 | Freshwater (M)     | 1 |
| Planctomycetaceae bacterium (0,0,1,0,0,0)           | Planctomycetes  | uncultured bacterium; B139; JX967696                                      | 0.72  | Soil               | 1 |
| Planctomycetaceae bacterium (0,0,1,0,0,0)           | Planctomycetes  | uncultured planctomycete; as2-39; GU257592                                | 0.923 | Sewage sludge      | 1 |
| Planctomycetaceae bacterium (0,1,0,0,0,0)           | Planctomycetes  | uncultured Planctomycetales bacterium; Alchichica_AL31_2_1B_172; JN825612 | 0.736 | Lake               | 1 |
| Planctomycetaceae bacterium (0,1,0,0,0,0)           | Planctomycetes  | uncultured bacterium; xyhpa1-58; HM051015                                 | 0.938 | Lake               | 1 |
| Planctomycetales bacterium (0,0,0,0,0,1)            | Planctomycetes  | uncultured bacterium; GJ16S2_G03; AB821100                                | 0.698 | Soil               | 1 |
| Planctomycetales bacterium (0,0,1,0,0,0)            | Planctomycetes  | uncultured bacterium; AK4AB2_02G; GQ396923                                | 0.772 | Soil               | 1 |
| Rhodopirellula sp (0,1,0,0,0,0)                     | Planctomycetes  | uncultured bacterium; N2_024; JX406211                                    | 0.941 | Lake               | 1 |
| Singulisphaera sp (0,0,0,1,0,0)                     | Planctomycetes  | uncultured planctomycete; P-B-An-25; JN867679                             | 0.829 | Wetland            | 1 |
| Puniceicoccaceae bacterium (1,0,0,0,0,0)            | Verrucomicrobia | uncultured organism; SBYC_4725; JN447017                                  | 0.589 | Microbial mat (GN) | 1 |
| Subdivision3_genera_incertainae_sedis (0,1,0,0,0,0) | Verrucomicrobia | uncultured bacterium; BJGMM-3s-171; JQ800931                              | 0.768 | Soil               | 1 |
| Subdivision3_genera_incertainae_sedis (0,1,0,0,0,0) | Verrucomicrobia | uncultured bacterium; FFCH15082; EU135450                                 | 0.881 | Soil               | 1 |
| Verrucomicrobiaceae bacterium (0,0,1,0,0,0)         | Verrucomicrobia | uncultured Roseibacillus sp.; UVmen3_12; JQ701280                         | 1     | Freshwater (M)     | 1 |
